# Supplementary material for: Cellular, Molecular and Proteomic Characteristics of Early Hepatocellular Carcinoma
Source: MDPI journal article supplement (doi:10.3390/cimb44100322), 2022-10-10
Supplement: s1 [file s1]

Figure S1:Determination of the significance of EPCAM, Vimentin and miR200b as biological markers for the determination of early HCC, Considering the area under the curve only miR200b seems to be a suitable molecule as a biomarker for early HCC diagnosis.

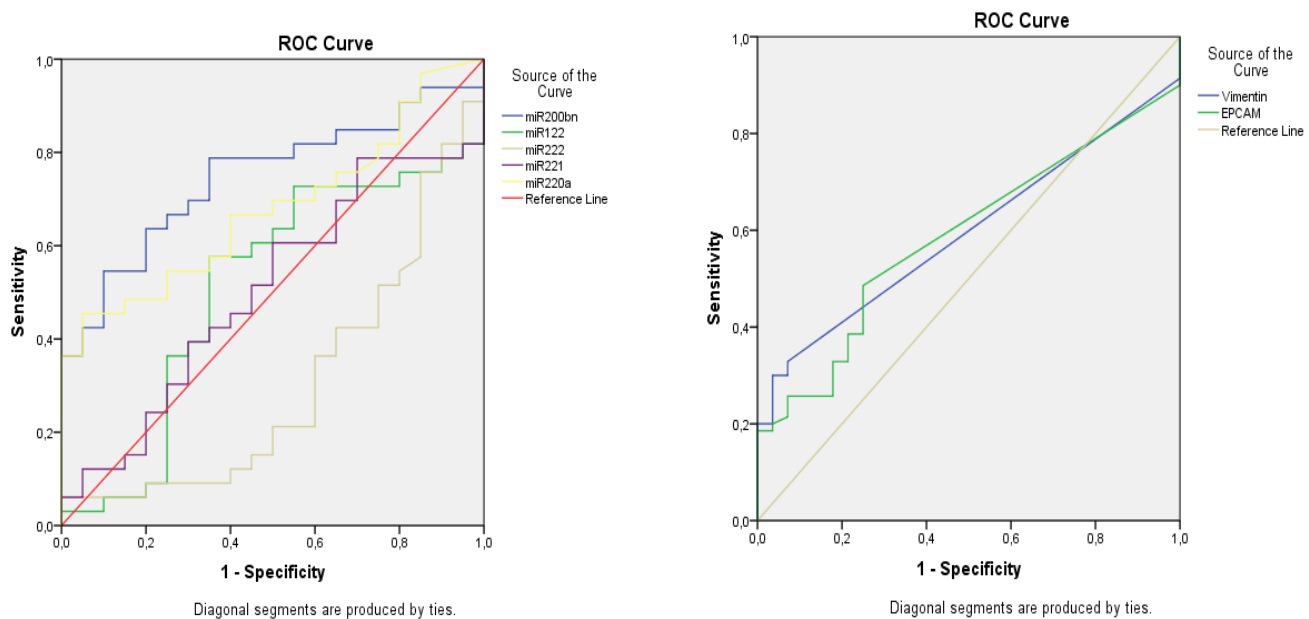

Area Under the Curve

| Test Result Variable(s) | Area | Std. Error <sup>a</sup> | Asymptotic Sig. <sup>b</sup> | Asymptotic 95% Confidence Interval |             |
|-------------------------|------|-------------------------|------------------------------|------------------------------------|-------------|
|                         |      |                         |                              | Lower Bound                        | Upper Bound |
| Vimentin                | ,595 | ,057                    | ,144                         | ,484                               | ,706        |
| EPCAM                   | ,587 | ,058                    | ,181                         | ,472                               | ,701        |
| miR200b                 | ,747 | ,067                    | ,003                         | ,616                               | ,818        |
| miR122                  | ,509 | ,085                    | ,912                         | ,343                               | ,675        |
| miR222                  | ,304 | ,076                    | ,017                         | ,154                               | ,453        |
| miR221                  | ,503 | ,081                    | ,971                         | ,344                               | ,662        |
| miR200a                 | ,670 | ,072                    | ,030                         | ,547                               | ,821        |

| Biomarker | Cut-off | sensitivity | 1-specificity |
|-----------|---------|-------------|---------------|
| EPCAM     | 2,16    | 40%         | 25%           |
| Vimentin  | 4,8     | 30%         | 36%           |
| miR200b   | 0,094   | 70%         | 30%           |

The test result variable(s): Vimentin, EPCAM has at least one tiebetween the positive actual state group and the negative actual state group. Statistics may be biased.

a. Under the nonparametric assumption

b. Null hypothesis: true area = 0.5

**Supplementary Table S1:** Specific genes and primers sequence for the gene expression analysis.

| Full Name                                                      | Primer         | Accession Number | Forward primer          | Reverse primer          |
|----------------------------------------------------------------|----------------|------------------|-------------------------|-------------------------|
| Homo sapiens miR-122-5p                                        | <b>miR122</b>  | MI0000442        | TGGAGTGTGACAATGGTGTTC   |                         |
| Homo sapiens miR-221-3p                                        | <b>miR221</b>  | MI0000298        | AGCTACATTGTCTGCTGGGTTTC |                         |
| Homo sapiens miR-222-3p                                        | <b>miR222</b>  | MI0000299        | AGCTACATCTGGCTACTGGGT   |                         |
| Homo sapiens miR-200a-3p                                       | <b>miR200a</b> | MI0000737        | TAACACTGTCTGGTAACGATGT  |                         |
| Homo sapiens miR-200b-3p                                       | <b>miR200b</b> | MI0000342        | TAATACTGCCTGGTAATGATGA  |                         |
| Homo sapiens Major vault protein (MVP)                         | <b>MVP</b>     | NM_017458.3      | GAGGGACCTGGCACGTACA     | TACGCCCCCTACTGTGGTGAC   |
| Homo sapiens epithelial cell adhesion molecule (EPCAM),        | <b>EPCAM</b>   | NM_002354.3      | GCCAGTGTACTTCAGTTGGTGC  | CCCTTCAGGTTTTGCTCTTCTCC |
| Homo sapiens Vimentin                                          | <b>VIM</b>     | NM_003380        | CTAACCAACGACAAAGCCC     | CCTCTCTCTGAAGCATCTCC    |
| Homo sapiens Alpha fetoprotein (AFP)                           | <b>AFP</b>     | NM_001134.3      | CCGAACCTTTCCAAGCCATAAC  | GACAATCCAGCACATCTCC     |
| Homo sapiens glyceraldehyde -3-phosphate dehydrogenase (GAPDH) | <b>GAPDH</b>   | NM_002046        | CAACGGATTTGGTCGTATT     | GATGGCAACAATATCCACTT    |
